# Supplementary material
Source: PubMed Central journal article supplement (PMC8641438)
Supplement: NIHMS1754433-supplement-SupplementaryContent.pdf [file NIHMS1754433-supplement-SupplementaryContent.pdf]

Supplementary Digital Content

**eTable 1:** Predictive value (PV) of the imputation by race/ethnicity based on residence and surname compared with the reported race/ethnic group in COVID-19 case report stratified by months (March through May and June through August) of diagnosis

|                         |                 | Predicted Race/Ethnicity |       |          |       |       |
|-------------------------|-----------------|--------------------------|-------|----------|-------|-------|
|                         |                 | Asian                    | Black | Hispanic | Other | White |
| <b>March–May</b>        |                 |                          |       |          |       |       |
| Reported Race/Ethnicity | <b>Asian</b>    | 33                       | 2     | 6        | 2     | 28    |
|                         | <b>Black</b>    | 3                        | 1183  | 12       | 3     | 654   |
|                         | <b>Hispanic</b> | 1                        | 7     | 156      | 0     | 38    |
|                         | <b>Other</b>    | 9                        | 17    | 11       | 0     | 45    |
|                         | <b>White</b>    | 5                        | 69    | 30       | 0     | 608   |
|                         | <b>PV</b>       | 65%                      | 93%   | 73%      | 0%    | 44%   |
| <b>June–Aug</b>         |                 |                          |       |          |       |       |
| Reported Race/Ethnicity | <b>Asian</b>    | 112                      | 14    | 9        | 2     | 52    |
|                         | <b>Black</b>    | 10                       | 3935  | 56       | 8     | 1100  |
|                         | <b>Hispanic</b> | 15                       | 70    | 1132     | 6     | 192   |
|                         | <b>Other</b>    | 3                        | 115   | 57       | 1     | 257   |
|                         | <b>White</b>    | 23                       | 123   | 73       | 2     | 2219  |
|                         | <b>PV</b>       | 69%                      | 92%   | 85%      | 5%    | 58%   |
